# Supplementary material for: Designing an alkali-metal-like superatom Ca3B for ambient nitrogen reduction to ammonia
Source: Royal Society of Chemistry journal article supplement (doi:10.1039/d1cp01533h), 2021-01-01

The electronic supplementary information for

**Designing an alkali-metal-like superatom  $\text{Ca}_3\text{B}$  for ambient nitrogen  
reduction to ammonia**

Xiao-Ling Zhang,<sup>a,b</sup> Ya-Ling Ye,<sup>a,b</sup> Li Zhang,<sup>a,b</sup> Xiang-Hui Li,<sup>c</sup> Dan Yu,<sup>d</sup> Jing-Hua  
Chen,<sup>b</sup> and Wei-Ming Sun<sup>\*a,b</sup>

<sup>a</sup>*Department of Basic Chemistry, The School of Pharmacy, Fujian Medical University, Fuzhou 350108,  
People's Republic of China. E-mail: sunwm@fjmu.edu.cn*

<sup>b</sup>*Fujian Key Laboratory of Drug Target Discovery and Structural and Functional Research, The  
School of Pharmacy, Fujian Medical University, Fuzhou 350108, People's Republic of China.*

<sup>c</sup>*The School of Medical Technology and Engineering, Fujian Medical University, Fuzhou 350004,  
Fujian, People's Republic of China*

<sup>d</sup>*Laboratory of Theoretical and Computational Chemistry, Institute of Theoretical Chemistry, Jilin  
University, Changchun 130023, People's Republic of China.*

## Table of Contents

|                                                                                                                                                                                           |     |
|-------------------------------------------------------------------------------------------------------------------------------------------------------------------------------------------|-----|
| <b>1. Tables</b> .....                                                                                                                                                                    | S3  |
| <b>Table S1</b> HOMO-LUMO gaps of the most stable $\text{Ca}_3\text{B}$ cluster calculated by using CAM-B3LYP, LC-BLYP, M06-2X methods.....                                               | S3  |
| <b>Table S2</b> The VIE and NPA charge on boron atom of $\text{M}_3\text{B}$ ( $\text{M} = \text{Be}, \text{Mg}, \text{and Ca}$ ).....                                                    | S4  |
| <b>Table S3</b> The change in NPA charges of $\text{Ca}_3$ subunit, B atom, and $\text{N}_2$ of $\text{Ca}_3\text{B-N}_2$ before and after of $\text{N}_2$ adsorption.....                | S5  |
| <b>2. Figures</b> .....                                                                                                                                                                   | S6  |
| <b>Fig. S1</b> Optimized structures of $\text{Ca}_3\text{B}^+$ with relative bond lengths, NPA charges, symmetry, and selected bond angles.....                                           | S6  |
| <b>Fig. S2</b> Global minima of the $\text{Mg}_3\text{B}$ and $\text{Be}_3\text{B}$ with selected bond lengths, bond angle, and symmetry.....                                             | S7  |
| <b>Fig. S3</b> The relationship between the VIE values and NPA charges on boron atom as atomic number of alkaline-earth ligand increases.....                                             | S8  |
| <b>Fig. S4</b> Optimized structures, selected bond lengths, symmetries, and relative energies of low-lying $\text{Ca}_3\text{B-N}_2$ isomers.....                                         | S9  |
| <b>Fig. S5</b> Optimized structures and N-N bond distance of $\text{N}_2$ , $\text{HN=NH}$ , and $\text{PhN=NPh}$ .....                                                                   | S10 |
| <b>Fig. S6</b> Optimized structures, selected bond lengths, symmetries, and $E_{\text{ad}}$ for absorbing $\text{H}^+/\text{e}^-$ to $^{\text{a}}\text{N}$ or $^{\text{b}}\text{N}$ ..... | S11 |
| <b>Fig. S7</b> The distance of the N-N bond of each intermediate in the reduction pathway.....                                                                                            | S12 |

## 1. Tables

**Table S1** The HOMO-LUMO gaps for  $\alpha$ -spin and  $\beta$ -spin states ( $\text{Gap}_\alpha$  and  $\text{Gap}_\beta$ , in eV) of the most stable  $\text{Ca}_3\text{B}$  cluster calculated by using CAM-B3LYP, LC-BLYP, and M06-2X methods in conjunction with the 6-311+G(3df) basis set.

| Isomers             | CAM-B3LYP | LC-BLYP | M06-2X |
|---------------------|-----------|---------|--------|
| $\text{Gap}_\alpha$ | 3.27      | 4.63    | 2.72   |
| $\text{Gap}_\beta$  | 4.35      | 4.90    | 3.27   |

**Table S2.** The calculated vertical ionization energies (VIEs, in eV) at the CCSD(T)//PBE0/6-311+G(3df) level and NPA charges on boron atom ( $Q_B$ , |e|) of  $M_3B$  (M = Be and Mg) at the PBE0/6-311+G(3df) level.

| Species           | VIE  | $Q_B$  |
|-------------------|------|--------|
| Be <sub>3</sub> B | 6.91 | -1.045 |
| Mg <sub>3</sub> B | 5.19 | -1.855 |

**Table S3.** The change in NPA charges ( $\Delta Q$ , |e|) on Ca<sub>3</sub>, B atom, and N<sub>2</sub> subunits before and after the N<sub>2</sub> adsorption to Ca<sub>3</sub>B at the PBE0/6-311+G(3df) level, where  $\Delta Q = Q_{\text{after}} - Q_{\text{before}}$ .

| Subunits        | Before N <sub>2</sub> adsorption | After N <sub>2</sub> adsorption | $\Delta Q$ |
|-----------------|----------------------------------|---------------------------------|------------|
| Ca <sub>3</sub> | 2.198                            | 2.182                           | -0.016     |
| B               | -2.198                           | -0.389                          | 1.809      |
| N <sub>2</sub>  | 0.000                            | -1.793                          | -1.793     |

## 2. Figures

**Fig. S1.** Optimized structure of  $\text{Ca}_3\text{B}^+$  with relative bond lengths, NPA charges, symmetry, and selected bond angle at the PBE0/6-311+G(3df) level.

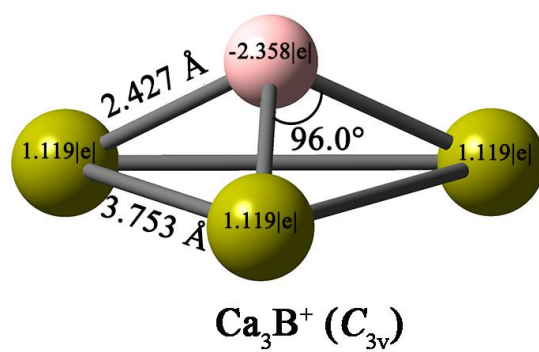

**Fig. S2.** Global minima of the  $\text{Mg}_3\text{B}$  and  $\text{Be}_3\text{B}$  with selected bond lengths, bond angles, and symmetries at the PBE0/6-311+G(3df) level.

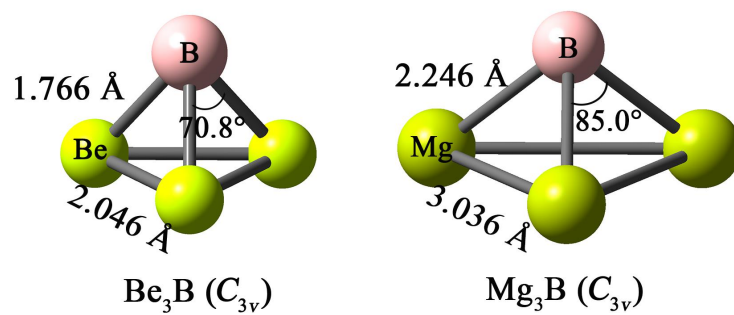

**Fig. S3.** The relationship between VIE values of  $M_3B$  and NPA charges on boron atom ( $Q_B$ ) as atomic number of alkaline-earth ligand increases.

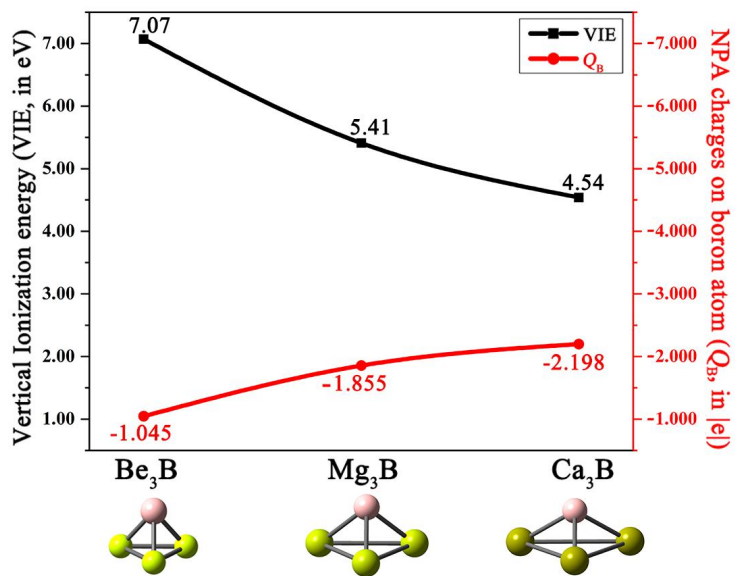



**Fig. S4.** The optimized structures, selected bond lengths, symmetries, and relative energies ( $E_{\text{rel}}$ , in kcal/mol) of low-lying  $\text{Ca}_3\text{B-N}_2$  isomers at the PBE0/6-311+G(3df) level.

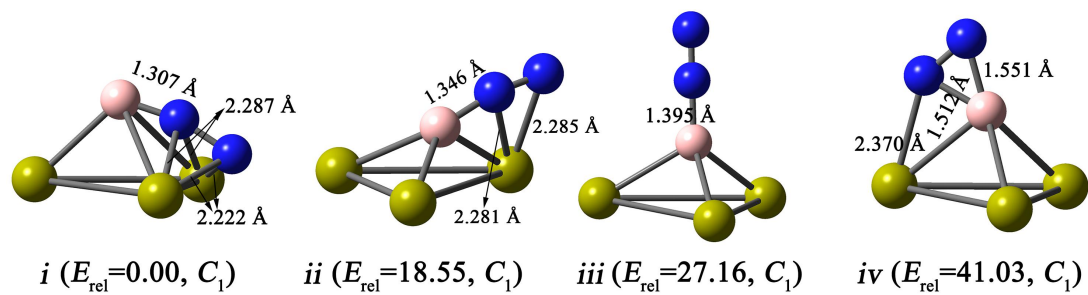

**Fig. S5.** The optimized structures and N-N bond distance of  $N_2$ , diazene ( $HN=NH$ ), and azobenzene ( $PhN=NPh$ ) at the PBE0/6-311+G(3df) level.

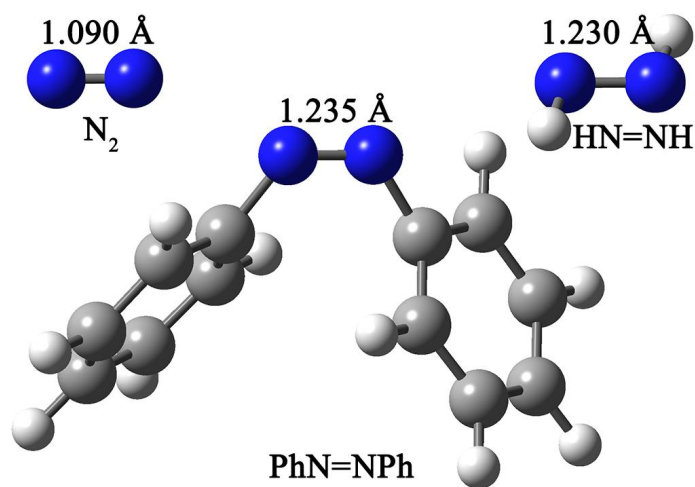

**Fig. S6.** The optimized structures, selected bond lengths, and adsorption energies ( $\Delta E$ ) for NNH\* complex, where  $\Delta E = E(\text{NNH}^*) - E(\text{N}_2^*) - E(\text{H}^+) - E(e^-)$ .

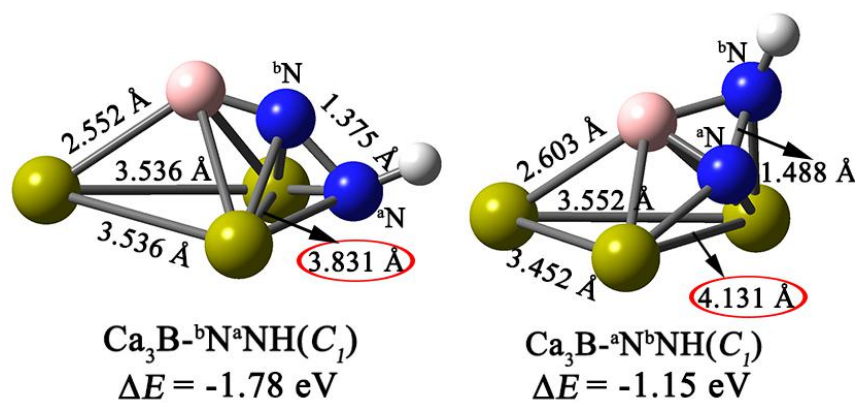

**Fig. S7.** The variation of N-N distance of critical intermediates in the NRR process of  $\text{Ca}_3\text{B}$ .

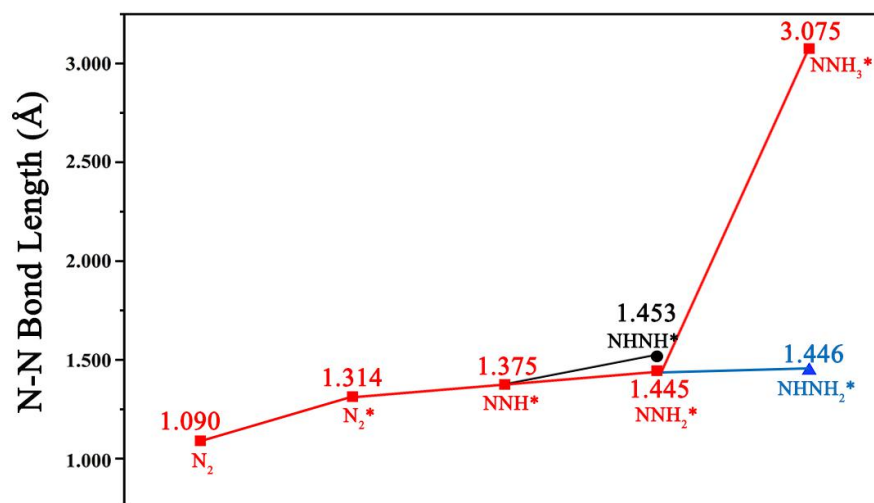

Supplement: d1cp01533h1.pdf [file d1cp01533h1.pdf]
